# Supplementary material
Source: PubMed Central journal article supplement (PMC4976497)
Supplement: NIHMS806783-supplement-Supplementary_Content.pdf [file NIHMS806783-supplement-Supplementary_Content.pdf]

## Supplementary Online Content

Awad MI, Palmer FL, Kou L, et al. Individualized risk estimation for postoperative complications after surgery for oral cavity cancer. Published online October 15, 2015. *JAMA Otolaryngol Head Neck Surg*. doi:10.1001/jamaoto.2015.2200.

**eTable 1.** Prescreening Univariate Analysis of Potential Predictors of Developing Complications

**eTable 2.** Factors Predictive of Developing Complications Requiring Invasive Intervention After Multivariate Analysis

**eTable 3.** Comparison of Variables Predictive of Developing Complications in Both Cohorts (n = 506)

**eFigure 1.** Calibration for Major Complication Nomograms

**eFigure 2.** Calibration of Validated Major Complication Nomograms

This supplementary material has been provided by the authors to give readers additional information about their work.

**eTABLE 1. Prescreening Univariate Analysis of Potential Predictors of Developing Complications**

| FACTOR                                | P VALUE                 |                          |
|---------------------------------------|-------------------------|--------------------------|
|                                       | Preoperative Time Point | Postoperative Time Point |
| Age                                   | 0.011                   | 0.011                    |
| Gender                                | 0.654                   | 0.654                    |
| Smoking                               | 0.277                   | 0.277                    |
| Alcohol                               | 0.608                   | 0.608                    |
| Body Mass Index                       | 0.08                    | 0.08                     |
| WUHNCI Score                          | <b>0.006</b>            | <b>0.006</b>             |
| Severe Comorbidity (WUHNCI $\geq$ 1)  | 0.055                   | 0.055                    |
| Karnofsky Performance Status          | <b>0.036</b>            | <b>0.036</b>             |
| ASA Physical Status                   | <b>0.006</b>            | <b>0.006</b>             |
| Clinical T Classification             | <b>&lt;0.001</b>        | <b>&lt;0.001</b>         |
| Clinical N Classification             | 0.28                    | 0.28                     |
| Overall TNM Stage                     | <b>0.008</b>            | <b>0.008</b>             |
| White Blood Cell                      | <b>0.001</b>            | <b>0.001</b>             |
| Hemoglobin                            | <b>0.001</b>            | <b>0.001</b>             |
| Hematocrit                            | <b>0.001</b>            | <b>0.001</b>             |
| Platelet                              | 0.543                   | 0.062                    |
| International Normalized Ratio        | 0.821                   | 0.967                    |
| Activated Partial Thromboplastin Time | 0.609                   | 0.508                    |
| Sodium                                | <b>0.021</b>            | <b>0.021</b>             |
| Potassium                             | 0.775                   | 0.787                    |
| Serum Creatinine                      | 0.057                   | <b>0.022</b>             |
| Albumin                               | 0.242                   | 0.229                    |
| Total Bilirubin                       | 0.325                   | 0.318                    |
| Aspartate Aminotransferase            | 0.503                   | 0.49                     |
| Alkaline Phosphatase                  | 0.108                   | 0.116                    |
| Neck Dissection                       | <b>0.006</b>            | <b>0.007</b>             |
| Bone Resection‡                       | <b>&lt;0.001</b>        | <b>&lt;0.001</b>         |
| Neck Dissection Laterality            | <b>0.006</b>            | <b>0.002</b>             |
| Neck Dissection Extent                | <b>0.001</b>            | <b>0.001</b>             |
| Reconstruction§                       | <b>&lt;0.001</b>        | <b>&lt;0.001</b>         |
| Tracheotomy                           | <b>&lt;0.001</b>        | <b>&lt;0.001</b>         |
| Time Under Anesthesia                 | N/A                     | <b>&lt;0.001</b>         |
| Volume of Colloid Transfused          | N/A                     | <b>0.001</b>             |
| Fluid Balance                         | N/A                     | <b>&lt;0.001</b>         |
| Estimated Blood Loss                  | N/A                     | <b>&lt;0.001</b>         |
| Perioperative Antibiotics             | N/A                     | 0.763                    |

‡Includes partial maxillectomy, marginal mandibulectomy, segmental mandibulectomy

§Includes split and full thickness skin grafts, AlloDerm, local and regional flaps, and microvascular free tissue transfer

ASA: American Society of Anesthesiologists, WUHNCI: Washington University Head and Neck Comorbidity Index

**eTABLE 2. Factors Predictive of Developing Complications Requiring Invasive Intervention After Multivariate Analysis**

| <b>PREOPERATIVE TIME POINT</b>  |                                             |                  |
|---------------------------------|---------------------------------------------|------------------|
| <b>Factor</b>                   | <b>Odds Ratio (95% Confidence Interval)</b> | <b>p Value</b>   |
| Body Mass Index (BMI)*          | 0.679 (0.396 – 1.163)                       | 0.158            |
| WUHNCI*                         | 1.464 (1.155 – 1.857)                       | <b>0.002</b>     |
| White Blood Count*              | 1.800 (1.301 – 2.490)                       | <b>&lt;0.001</b> |
| Hematocrit*                     | 0.581 (0.345 – 0.979)                       | <b>0.041</b>     |
| Planned Neck Dissection†        | 4.270 (0.882 – 20.670)                      | <b>0.071</b>     |
| Planned Tracheotomy†            | 4.384 (1.822 – 10.546)                      | <b>0.001</b>     |
| <b>POSTOPERATIVE TIME POINT</b> |                                             |                  |
| <b>Factor</b>                   | <b>Odds Ratio (95% Confidence Interval)</b> | <b>p Value</b>   |
| WUHNCI*                         | 1.406 (1.127 – 1.754)                       | <b>0.003</b>     |
| White Blood Count*              | 1.626 (1.207 – 2.189)                       | <b>0.001</b>     |
| Hematocrit*                     | 0.523 (0.315 – 0.869)                       | <b>0.012</b>     |
| Time Under Anesthesia*          | 2.856 (1.934 – 4.216)                       | <b>&lt;0.001</b> |

\*Odds ratio for continuous variables calculated based on contrast of Q3 versus Q1

†Odds ratio calculated with “Yes” being the reference

WUHNCI: Washington University Head and Neck Comorbidity Index

| <b>eTABLE 3. Comparison of Variables Predictive of Developing Complications in Both Cohorts (n = 506)</b> |                                |                                  |                |
|-----------------------------------------------------------------------------------------------------------|--------------------------------|----------------------------------|----------------|
| <b>VARIABLE</b>                                                                                           | <b>Modeling Cohort (n=354)</b> | <b>Validation Cohort (n=152)</b> | <b>p Value</b> |
| Age (years)                                                                                               |                                |                                  |                |
| Mean                                                                                                      | 62.2                           | 63.7                             | 0.307          |
| Standard Deviation                                                                                        | 14.0                           | 15.3                             |                |
| BMI (kg/m <sup>2</sup> )                                                                                  |                                |                                  |                |
| Mean                                                                                                      | 27.7                           | 27.2                             | 0.343          |
| Standard Deviation                                                                                        | 5.9                            | 5.1                              |                |
| WUHNCI Score                                                                                              |                                |                                  |                |
| Mean                                                                                                      | 0.7                            | 1.4                              | 0.696          |
| Standard Deviation                                                                                        | 0.7                            | 1.3                              |                |
| Severe Comorbidity (WUHNCI ≥1)                                                                            |                                |                                  |                |
| Yes (%)                                                                                                   | 116 (32.8)                     | 47 (30.9)                        | 0.684          |
| No (%)                                                                                                    | 238 (67.2)                     | 105 (69.1)                       |                |
| Clinical T Classification                                                                                 |                                |                                  |                |
| T1 & T2 (%)                                                                                               | 273 (77.1)                     | 117 (78.0)                       | 0.829          |
| T3 & T4a (%)                                                                                              | 81 (22.9)                      | 33 (22.0)                        |                |
| Tx                                                                                                        | 0                              | 2                                |                |
| White Blood Cell (x 10 <sup>3</sup> /μL)                                                                  |                                |                                  |                |
| Mean                                                                                                      | 7.3                            | 7.5                              | 0.344          |
| Standard Deviation                                                                                        | 2.5                            | 2.2                              |                |
| Hematocrit (%)                                                                                            |                                |                                  |                |
| Mean                                                                                                      | 40.7                           | 40.1                             | 0.080          |
| Standard Deviation                                                                                        | 3.8                            | 3.7                              |                |
| Sodium (mEq/L)                                                                                            |                                |                                  |                |
| Mean                                                                                                      | 140.3                          | 140.3                            | 0.827          |
| Standard Deviation                                                                                        | 2.8                            | 3.0                              |                |
| Alkaline Phosphatase (U/L)                                                                                |                                |                                  |                |
| Mean                                                                                                      | 82.4                           | 78.2                             | 0.342          |
| Standard Deviation                                                                                        | 40.4                           | 46.7                             |                |
| Neck Dissection                                                                                           |                                |                                  |                |
| Yes (%)                                                                                                   | 248 (70.1)                     | 109 (71.7)                       | 0.708          |
| No (%)                                                                                                    | 106 (29.9)                     | 43 (28.3)                        |                |
| Bone Resection*                                                                                           |                                |                                  |                |
| Yes (%)                                                                                                   | 125 (35.3)                     | 60 (39.5)                        | 0.373          |
| No (%)                                                                                                    | 229 (64.7)                     | 92 (60.5)                        |                |
| Tracheotomy                                                                                               |                                |                                  |                |
| Yes (%)                                                                                                   | 93 (26.3)                      | 46 (30.3)                        | 0.356          |
| No (%)                                                                                                    | 261 (73.7)                     | 106 (69.7)                       |                |
| Time Under Anesthesia (min)                                                                               |                                |                                  |                |
| Mean                                                                                                      | 322.9                          | 313.7                            | 0.689          |
| Standard Deviation                                                                                        | 261.3                          | 225.4                            |                |
| Estimated Blood Loss (mL)                                                                                 |                                |                                  |                |
| Mean                                                                                                      | 145.2                          | 189.1                            | <b>0.026</b>   |
| Standard Deviation                                                                                        | 180.3                          | 209.9                            |                |
| No. of Complications (%)                                                                                  |                                |                                  |                |
| Requiring Invasive Intervention                                                                           | 36 (10.2)                      | 16 (10.5)                        | 0.904          |

\*Includes partial maxillectomy, marginal mandibulectomy, segmental mandibulectomy  
 BMI: Body Mass Index, WUHNCI: Washington University Head and Neck Comorbidity Index

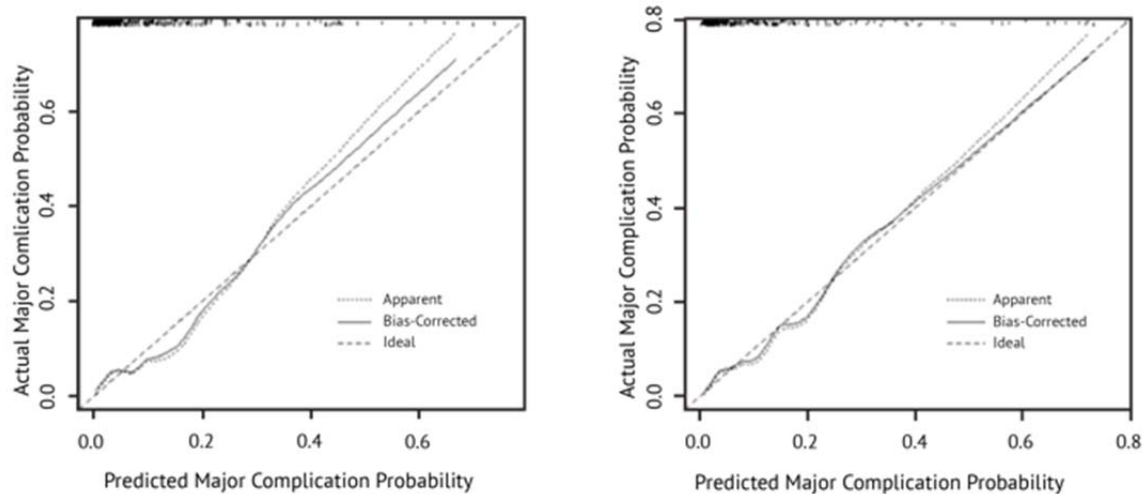

**eFigure 1. Calibration for Major Complication Nomograms**

Nomogram calibration demonstrated by plotting the expected against the observed probabilities of developing a complication requiring invasive intervention in the preoperative setting (left) and postoperative setting (right). Bootstrapping was employed to correct for overfitting bias.

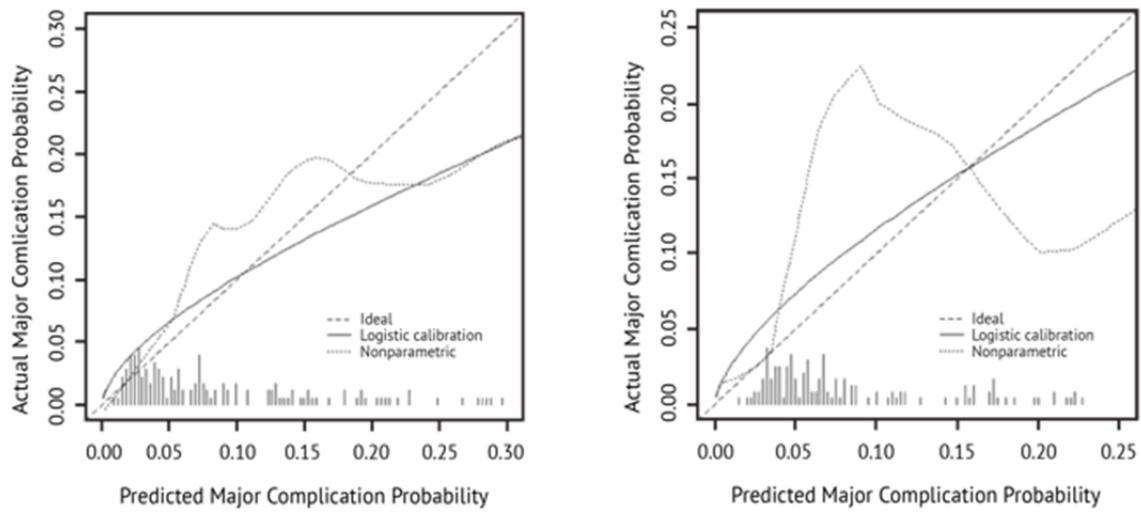

**eFigure 2. Calibration of Validated Major Complication Nomograms**

Calibration of the validation of the nomogram used in the preoperative setting (left) and postoperative setting (right), demonstrated by plotting the expected against the observed probabilities of developing a complication requiring invasive intervention.
